# Supplementary material for: Expression Pattern of Purinergic Signaling Components in Colorectal Cancer Cells and Differential Cellular Outcomes Induced by Extracellular ATP and Adenosine
Source: MDPI journal article supplement (doi:10.3390/ijms222111472), 2021-10-25

## ***Supplemental information***

### ***Quantitative Real Time PCR***

As described in the main text of the manuscript, total RNA was extracted using the RNeasy® Plus Micro Kit (Qiagen), cDNA was prepared using RevertAid H Minus Reverse Transcriptase (ThermoFisher) and qRT-PCR was performed in duplicate using SYBR Green Gene Expression Assays (SensiFAST™ SYBR® No-Rox Kit Bioline). Data were analysed using the comparative threshold cycle method with 36B4 gene expression levels used for data normalization. Gene specific primers, KiCqStart® SYBR® Green Primers, were purchased from Sigma Aldrich-Merck and are listed thereafter:

| Target | Forward (5'→3')        | Reverse (5'→3')        |
|--------|------------------------|------------------------|
| CD39   | CTTGTGCTATGGGAAGGATCAG | GCATGGGTCCCTGAGAATTT   |
| P2RX1  | CCTAAGAGGCACTACTACAAG  | ATCAGGATGTCCTCATGTTC   |
| P2RX2  | CCTCTGTCAGCCAATTTTC    | ATTTGGGGTAGTGGATGC     |
| P2RX6  | CAGAACTTCACACTGTTTCATC | GGCTGAATTGTGGTTCATAG   |
| P2RY4  | AGGGAACCCAATAGTGATAC   | GAGTAGAAGATTGGCATTGG   |
| P2RY12 | AAGAGCACTCAAGACTTTAC   | GGGTTTGAATGTATCCAGTAAG |
| P2RY13 | ACAGAGAGAACTGAGTATCC   | CACAGAGCCAAAGTATTCAG   |

# Supplementary table S1

**Expression levels of selected genes involved in purinergic signaling:** HT29 cells were grown in either 2D or 3D culture conditions and gene expression levels determined through RNA sequencing as described in the main core of the manuscript. Boxed lines indicate the genes consistently expressed in all the CRC cell lines tested.

|                  |                 | Counts 2D | Counts 3D | Log2foldchange<br>2Dvs3D | pvalue      |
|------------------|-----------------|-----------|-----------|--------------------------|-------------|
| ENTPD1<br>(CD39) | ENSG00000138185 | 0,583     | 0,708     | 0,17241803               | 0,865473277 |
| NT5E<br>(CD73)   | ENSG00000135318 | 268,250   | 162,500   | -0,91419885              | 2,01149E-07 |
| PANX1            | ENSG00000110218 | 101,833   | 103,000   | -0,21249751              | 0,247035108 |
| P2RX1            | ENSG00000108405 | 0,042     | 0,542     | 2,82761758               | 0,006551099 |
| P2RX2            | ENSG00000187848 | 0,000     | 0,000     |                          |             |
| P2RX3            | ENSG00000109991 | 0,000     | 0,000     |                          |             |
| P2RX4            | ENSG00000135124 | 21,458    | 64,375    | 1,33932901               | 6,98108E-14 |
| P2RX5            | ENSG00000083454 | 0,250     | 0,042     | -1,31357412              | 0,065296492 |
| P2RX6            | ENSG00000099957 | 2,500     | 6,417     | 1,15510213               | 0,00772777  |
| P2RX7            | ENSG00000089041 | 0,083     | 0,042     | -0,4427451               | 0,659749943 |
| P2RY1            | ENSG00000169860 | 6,667     | 5,375     | -0,58119221              | 0,077381602 |
| P2RY2            | ENSG00000175591 | 119,417   | 133,042   | -0,0722265               | 0,704047614 |
| P2RY4            | ENSG00000186912 | 0,000     | 0,000     |                          |             |
| P2RY6            | ENSG00000171631 | 0,083     | 0,125     | 0,12065394               | 0,934306669 |
| P2RY11           | ENSG00000244165 | 36,292    | 48,625    | 0,19078382               | 0,446042779 |
| P2RY12           | ENSG00000169313 | 0,000     | 0,000     |                          |             |
| P2RY13           | ENSG00000181631 | 0,000     | 0,000     |                          |             |
| P2RY14           | ENSG00000174944 | 0,000     | 0,000     |                          |             |
| A1               | ENSG00000163485 | 0,083     | 0,250     | 0,62790844               | 0,452658535 |
| A2A              | ENSG00000128271 | 1,292     | 1,667     | 0,1479647                | 0,789833651 |
| A2B              | ENSG00000170425 | 29,875    | 28,042    | -0,31886031              | 0,022922839 |
| A3               | ENSG00000282608 | 0,000     | 0,083     |                          |             |

Total counts 2D 3329252,79

Total counts 3D 3968994,54

# Supplementary table S2

**Expression levels of selected genes involved in purinergic signaling:** LS513 cells were grown in either 2D or 3D culture conditions and gene expression levels determined through RNA sequencing as described in the main core of the manuscript. Boxed lines indicate the genes consistently expressed in all the CRC cell lines tested.

|                  |                 | Counts 2D | Counts 3D | Log2foldchange<br>2Dvs3D | pvalue      |
|------------------|-----------------|-----------|-----------|--------------------------|-------------|
| ENTPD1<br>(CD39) | ENSG00000138185 | 0,042     | 0,042     | 0,27594853               | 0,679040738 |
| NT5E<br>(CD73)   | ENSG00000135318 | 176,042   | 118,708   | -0,39115783              | 0,015786378 |
| PANX1            | ENSG00000110218 | 109,833   | 90,083    | -0,11401145              | 0,626998453 |
| P2RX1            | ENSG00000108405 | 0,208     | 1,167     | 2,61257177               | 0,001459872 |
| P2RX2            | ENSG00000187848 | 0,000     | 0,000     |                          |             |
| P2RX3            | ENSG00000109991 | 0,000     | 0,042     | 1,47749557               | 0,614491146 |
| P2RX4            | ENSG00000135124 | 56,750    | 106,500   | 1,08213624               | 9,24759E-12 |
| P2RX5            | ENSG00000083454 | 0,000     | 0,000     |                          |             |
| P2RX6            | ENSG00000099957 | 4,042     | 4,667     | 0,48401614               | 0,187739029 |
| P2RX7            | ENSG00000089041 | 0,042     | 0,000     |                          |             |
| P2RY1            | ENSG00000169860 | 76,458    | 56,375    | -0,28829386              | 0,210654481 |
| P2RY2            | ENSG00000175591 | 59,458    | 90,500    | 0,76920493               | 1,03808E-08 |
| P2RY4            | ENSG00000186912 | 0,042     | 0,083     | 0,2547531                | 0,819025089 |
| P2RY6            | ENSG00000171631 | 0,042     | 0,000     | -0,22993798              | 0,791807641 |
| P2RY11           | ENSG00000244165 | 37,958    | 39,333    | 0,22918604               | 0,221955153 |
| P2RY12           | ENSG00000169313 | 0,000     | 0,000     |                          |             |
| P2RY13           | ENSG00000181631 | 0,000     | 0,000     |                          |             |
| P2RY14           | ENSG00000174944 | 0,000     | 0,000     |                          |             |
| A1               | ENSG00000163485 | 0,083     | 0,000     | -0,40337452              | 0,480024752 |
| A2A              | ENSG00000128271 | 0,333     | 0,625     | 0,79351517               | 0,109065557 |
| A2B              | ENSG00000170425 | 247,958   | 229,458   | 0,06367985               | 0,505226793 |
| A3               | ENSG00000282608 | 0,000     | 0,000     |                          |             |

Total counts 2D 3994063,12

Total counts 3D 3911649,67

### Supplementary table S3

**Expression levels of selected genes involved in purinergic signaling:** HCT116 cells were grown in either 2D or 3D culture conditions and gene expression levels determined through RNA sequencing as described in the main core of the manuscript. Boxed lines indicate the genes consistently expressed in all the CRC cell lines tested.

|                  |                 | Counts 2D | Counts 3D | Log2foldchange<br>2Dvs3D | pvalue      |
|------------------|-----------------|-----------|-----------|--------------------------|-------------|
| ENTPD1<br>(CD39) | ENSG00000138185 | 0,833     | 0,625     | -0,01075877              | 0,993151258 |
| NT5E<br>(CD73)   | ENSG00000135318 | 131,750   | 211,375   | 0,78465174               | 1,72066E-05 |
| PANX1            | ENSG00000110218 | 139,000   | 110,167   | -0,19321148              | 0,32554193  |
| P2RX1            | ENSG00000108405 | 0,000     | 0,000     |                          |             |
| P2RX2            | ENSG00000187848 | 0,000     | 0,000     |                          |             |
| P2RX3            | ENSG00000109991 | 0,000     | 0,083     |                          |             |
| P2RX4            | ENSG00000135124 | 41,458    | 70,500    | 0,89850821               | 5,98902E-07 |
| P2RX5            | ENSG00000083454 | 69,458    | 59,750    | -0,08944247              | 0,606801488 |
| P2RX6            | ENSG00000099957 | 0,083     | 0,625     | 1,97177013               | 0,003244549 |
| P2RX7            | ENSG00000089041 | 7,792     | 7,042     | -0,03147187              | 0,962904477 |
| P2RY1            | ENSG00000169860 | 10,792    | 5,167     | -0,89983104              | 0,00419208  |
| P2RY2            | ENSG00000175591 | 21,667    | 17,333    | -0,17668704              | 0,422941595 |
| P2RY4            | ENSG00000186912 | 0,125     | 0,208     | 0,26723185               |             |
| P2RY6            | ENSG00000171631 | 0,958     | 0,750     | -0,09958365              | 0,948214301 |
| P2RY11           | ENSG00000244165 | 97,333    | 106,625   | 0,25908546               | 0,292485259 |
| P2RY12           | ENSG00000169313 | 0,000     | 0,000     |                          |             |
| P2RY13           | ENSG00000181631 | 0,000     | 0,000     |                          |             |
| P2RY14           | ENSG00000174944 | 0,042     | 0,000     |                          |             |
| A1               | ENSG00000163485 | 26,917    | 21,917    | -0,15445415              | 0,656069292 |
| A2A              | ENSG00000128271 | 25,667    | 19,250    | -0,25731977              | 0,430194994 |
| A2B              | ENSG00000170425 | 176,917   | 193,667   | 0,26508206               | 0,02426093  |
| A3               | ENSG00000282608 | 0,000     | 0,000     |                          |             |

Total counts 2D 3868643,00

Total counts 3D 3805645,62

# Supplementary table S4

**Expression levels of selected genes involved in purinergic signaling:** LS174T cells were grown in either 2D or 3D culture conditions and gene expression levels determined through RNA sequencing as described in the main core of the manuscript. Boxed lines indicate the genes consistently expressed in all the CRC cell lines tested.

|                  |                 | Counts 2D | Counts 3D | Log2foldchange<br>2Dvs3D | pvalue     |
|------------------|-----------------|-----------|-----------|--------------------------|------------|
| ENTPD1<br>(CD39) | ENSG00000138185 | 0,292     | 0,625     | 0,73792444               | 0,42963845 |
| NT5E<br>(CD73)   | ENSG00000135318 | 200,250   | 153,708   | -0,23863167              | 0,27297981 |
| PANX1            | ENSG00000110218 | 97,375    | 77,875    | -0,19119169              | 0,33789564 |
| P2RX1            | ENSG00000108405 | 0,000     | 0,000     |                          |            |
| P2RX2            | ENSG00000187848 | 0,000     | 0,000     |                          |            |
| P2RX3            | ENSG00000109991 | 0,042     | 0,000     |                          |            |
| P2RX4            | ENSG00000135124 | 26,667    | 35,167    | 0,5777736                | 0,00469974 |
| P2RX5            | ENSG00000083454 | 54,708    | 43,292    | -0,18892671              | 0,23265389 |
| P2RX6            | ENSG00000099957 | 1,083     | 1,208     | 0,48511635               | 0,43616165 |
| P2RX7            | ENSG00000089041 | 0,042     | 0,083     | 0,11610692               | 0,92498638 |
| P2RY1            | ENSG00000169860 | 41,333    | 24,583    | -0,62297166              | 0,0344497  |
| P2RY2            | ENSG00000175591 | 16,875    | 15,167    | -0,00901346              | 0,97649341 |
| P2RY4            | ENSG00000186912 | 0,167     | 0,042     |                          |            |
| P2RY6            | ENSG00000171631 | 0,000     | 0,042     |                          |            |
| P2RY11           | ENSG00000244165 | 87,375    | 89,583    | 0,18700387               | 0,46940936 |
| P2RY12           | ENSG00000169313 | 0,000     | 0,000     |                          |            |
| P2RY13           | ENSG00000181631 | 0,000     | 0,000     |                          |            |
| P2RY14           | ENSG00000174944 | 0,000     | 0,000     |                          |            |
| A1               | ENSG00000163485 | 0,292     | 0,375     | 0,36013038               | 0,67439652 |
| A2A              | ENSG00000128271 | 0,750     | 0,667     | 0,0261776                | 0,97511343 |
| A2B              | ENSG00000170425 | 194,708   | 184,625   | 0,06708552               | 0,64613996 |
| A3               | ENSG00000282608 | 0,000     | 0,000     |                          |            |

Total counts 2D 3867423,12

Total counts 3D 3807228,46

### Supplementary table S5

**Transcriptional expression levels of 3 independent genes (A, NT5E; B, PANX1; C, P2Y2) measured by quantitative Real-Time PCR in CRC (HT29, LS513, HCT116 and LS174T) and non-tumorigenic colonic (HCEC-1CT) cell lines (n =4) grown in 2D. Fold changes were calculated by using the  $2^{-\Delta\Delta Ct}$  method. Briefly, for each cell line, the mRNA expression levels of the housekeeping gene 36B4 (RPL0) were used as an internal control to normalize gene expression levels. The difference between the Ct values ( $\Delta Ct$ ) of the genes of interest and the housekeeping gene was then calculated for each experimental sample and the difference in the  $\Delta Ct$  values between the experimental (CRC cells) and control (HCEC-1CT) samples  $\Delta\Delta Ct$  calculated. Relative gene expression levels were expressed as the fold changes calculated for each CRC samples compared to the HCEC-1CT cells (equal to  $2^{-\Delta\Delta Ct}$ ).**

*All Ct values are averages of at least 4 independent experiments done in duplicate.*

#### (A)

| Cell lines | Genes | Ct     | $\Delta Ct = Ct \text{ gene of interest} - Ct \text{ housekeeping gene}$ | $\Delta\Delta Ct = \Delta Ct \text{ cells of interest} - \Delta Ct \text{ control HCEC1-CT cells}$ | Fold changes = $2^{-\Delta\Delta Ct}$ |
|------------|-------|--------|--------------------------------------------------------------------------|----------------------------------------------------------------------------------------------------|---------------------------------------|
| HCT116     | NT5E  | 20,04  | 6,56                                                                     | 2,095                                                                                              | 0,234068062                           |
| HT29       |       | 19,62  | 6,07                                                                     | 1,605                                                                                              | 0,32873569                            |
| LS513      |       | 18,92  | 5,25                                                                     | 0,785                                                                                              | 0,580351957                           |
| LS174T     |       | 19,491 | 6,361                                                                    | 1,896                                                                                              | 0,268687293                           |
| HCEC-1CT   |       | 17,515 | 4,465                                                                    | 0                                                                                                  | 1                                     |
| HCT116     | RPL0  | 13,48  |                                                                          |                                                                                                    |                                       |
| HT29       |       | 13,55  |                                                                          |                                                                                                    |                                       |
| LS513      |       | 13,67  |                                                                          |                                                                                                    |                                       |
| LS174T     |       | 13,13  |                                                                          |                                                                                                    |                                       |
| HCEC-1CT   |       | 13,05  |                                                                          |                                                                                                    |                                       |

**(B)**

| Cell lines | Genes        | Ct      | $\Delta Ct = Ct \text{ gene of interest} - Ct \text{ housekeeping gene}$ | $\Delta\Delta Ct = \Delta Ct \text{ cells of interest} - \Delta Ct \text{ control HCEC1-CT cells}$ | Fold changes = $2^{-\Delta\Delta Ct}$ |
|------------|--------------|---------|--------------------------------------------------------------------------|----------------------------------------------------------------------------------------------------|---------------------------------------|
| HCT116     | <b>PANX1</b> | 19,14   | 6,12                                                                     | 0,712                                                                                              | 0,610473256                           |
| HT29       |              | 19,35   | 5,98                                                                     | 0,572                                                                                              | 0,672683604                           |
| LS513      |              | 19,25   | 5,4975                                                                   | 0,0895                                                                                             | 0,939848419                           |
| LS174T     |              | 19,4525 | 6,3725                                                                   | 0,9645                                                                                             | 0,512455984                           |
| HCEC-1CT   |              | 17,748  | 5,408                                                                    | 0                                                                                                  | 1                                     |
| HCT116     | <b>RPL0</b>  | 13,02   |                                                                          |                                                                                                    |                                       |
| HT29       |              | 13,37   |                                                                          |                                                                                                    |                                       |
| LS513      |              | 13,7525 |                                                                          |                                                                                                    |                                       |
| LS174T     |              | 13,08   |                                                                          |                                                                                                    |                                       |
| HCEC-1CT   |              | 12,34   |                                                                          |                                                                                                    |                                       |

**(C)**

| Cell lines | Genes       | Ct     | $\Delta Ct = Ct \text{ gene of interest} - Ct \text{ housekeeping gene}$ | $\Delta\Delta Ct = \Delta Ct \text{ cells of interest} - \Delta Ct \text{ control HCEC1-CT cells}$ | Fold changes = $2^{-\Delta\Delta Ct}$ |
|------------|-------------|--------|--------------------------------------------------------------------------|----------------------------------------------------------------------------------------------------|---------------------------------------|
| HCT116     | <b>P2Y2</b> | 24,425 | 10,705                                                                   | -11,775                                                                                            | 3504,517225                           |
| HT29       |             | 20,9   | 7,46                                                                     | -15,02                                                                                             | 33225,42423                           |
| LS513      |             | 21,88  | 8,1                                                                      | -14,38                                                                                             | 21321,18496                           |
| LS174T     |             | 23,64  | 10,31                                                                    | -12,17                                                                                             | 4608,239553                           |
| HCEC-1CT   |             | 35,17  | 22,48                                                                    | 0                                                                                                  | 1                                     |
| HCT116     | <b>RPL0</b> | 13,72  |                                                                          |                                                                                                    |                                       |
| HT29       |             | 13,44  |                                                                          |                                                                                                    |                                       |
| LS513      |             | 13,78  |                                                                          |                                                                                                    |                                       |
| LS174T     |             | 13,33  |                                                                          |                                                                                                    |                                       |
| HCEC-1CT   |             | 12,69  |                                                                          |                                                                                                    |                                       |

### Supplementary Figure S1

**Correlation of gene expression levels assessed on extracts prepared from cells grown in 2D through RNA sequencing (Counts, Y axis) and qRT-PCR (Ct values, X axis).**

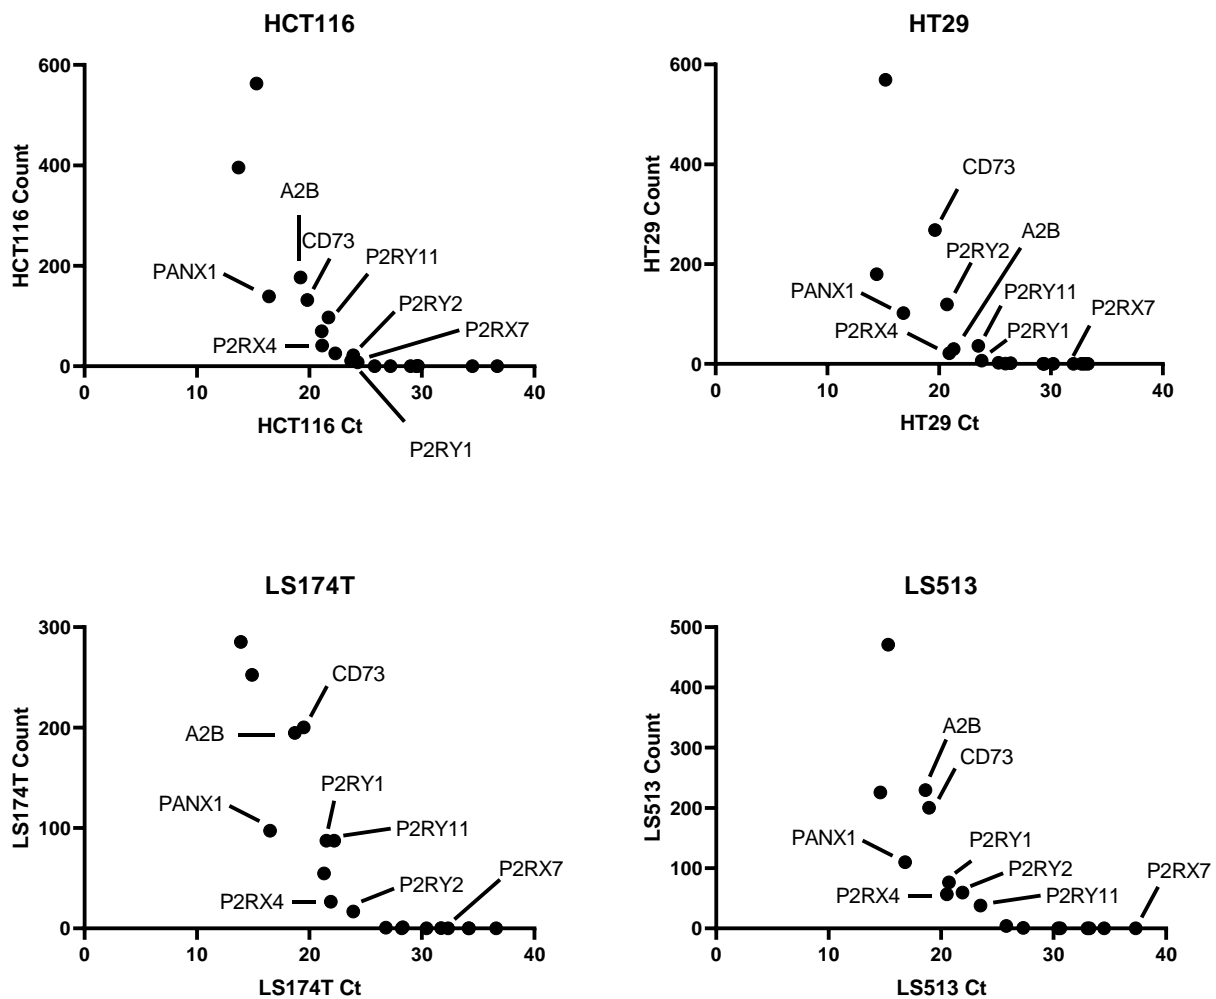



Supplementary Figure S2

**Effect of purine molecules on 2D cell viability.** CRC (HCT116, LS513, HT29, LS174T) and non-tumorigenic colonic (FHC, HCEC-1CT) cell lines were treated for 4 days with increasing concentrations of ATP, ATP $\gamma$ S and adenosine (range 0-1000  $\mu$ M) and cell viability assessed by the MTT assay (upper panels;  $n \geq 3$ ). IC50 mean values were calculated and are indicated in the lower panels (histograms and table).

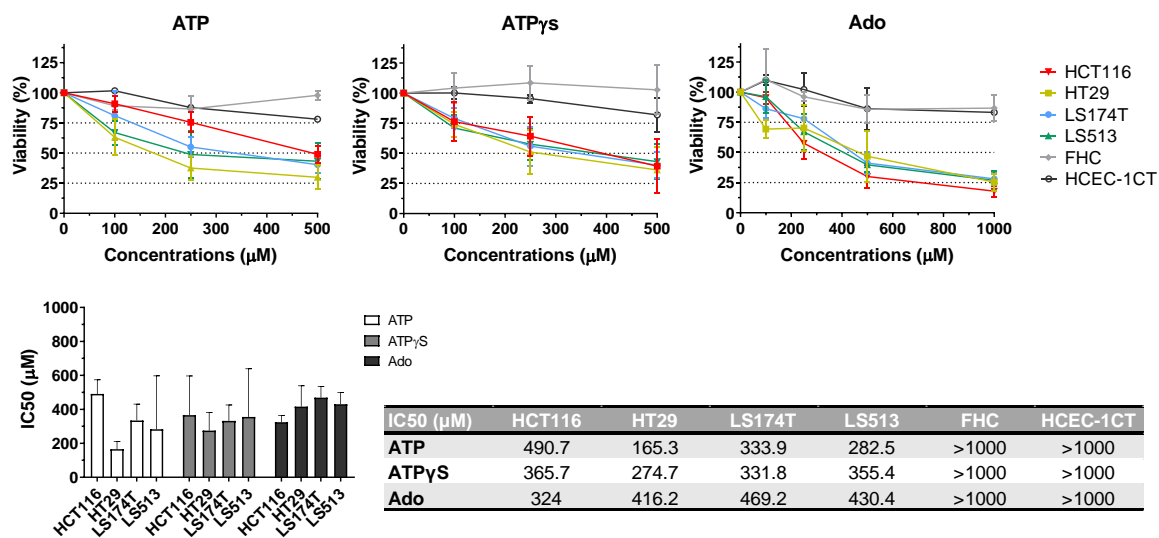

### Supplementary Figure S3

**Effect of purine molecules on Cell cycle progression.** (A) Flow cytometry cell cycle analysis carried out on CRC cell lines treated by ATP (250 $\mu$ M – 24h) or Adenosine (250 $\mu$ M – 24h) by BrdU and 7-AAD (DNA content) co-labeling. On this graph, only the percentage of cells in S phase is represented. (B) Flow cytometry representative diagrams obtained after treatment of LS174T cells with ATP (250 $\mu$ M), Adenosine (250 $\mu$ M) or left untreated for 24h and then labeled with BrdU and 7-AAD (DNA content). (C) Flow cytometry representative diagrams obtained after treatment of HT29 cells with ATP (250 $\mu$ M), Adenosine (250 $\mu$ M) or left untreated for 24h and then labeled with BrdU and 7-AAD (DNA content).

**A**

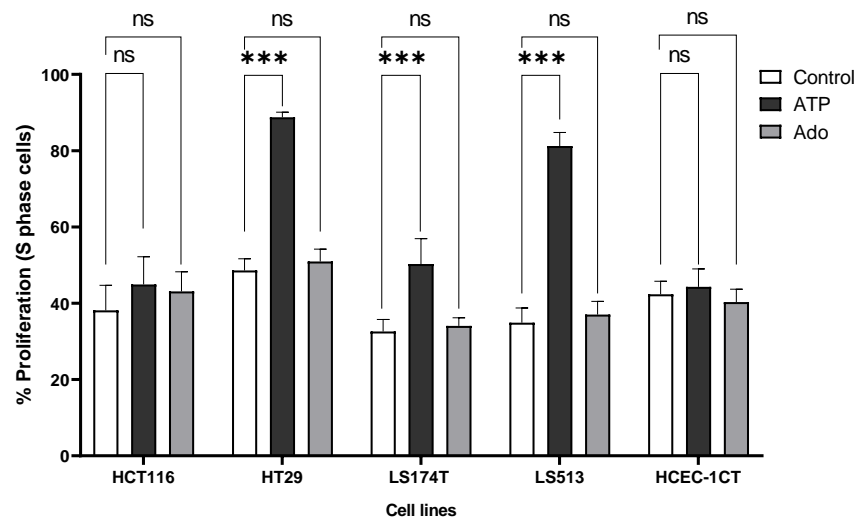

**B**

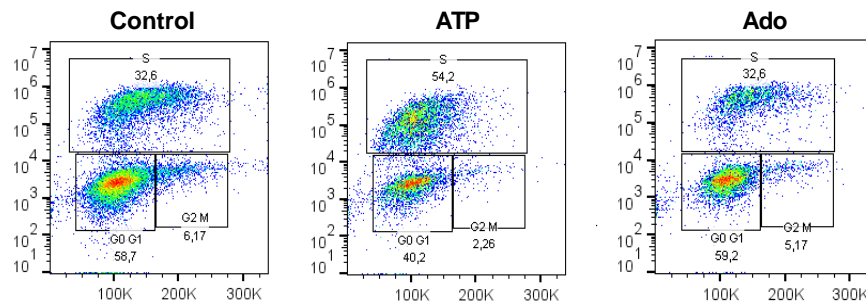

**C**

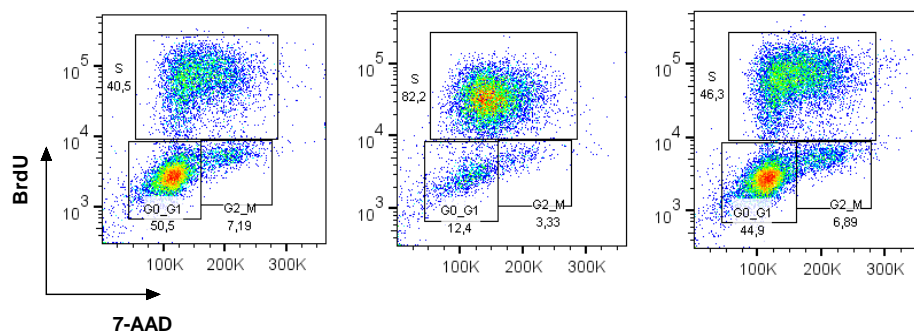

### Supplementary Figure S4

**Effect of the AR-C 118925XX competitive P2RY2 receptor antagonist on ATP anticancer activity.** HT29 and HCEC-1CT cell lines were treated for 4 days with increasing concentrations of ATP (range 0-1000  $\mu$ M) in presence or not of 4  $\mu$ M AR-C 118925XX. Cell viability was assessed by the CellTiter-Glo 2.0 assay. Data are expressed as mean  $\pm$  SD ( $n = 3$ ). SDs are indicated by error bars when they exceed symbol size.

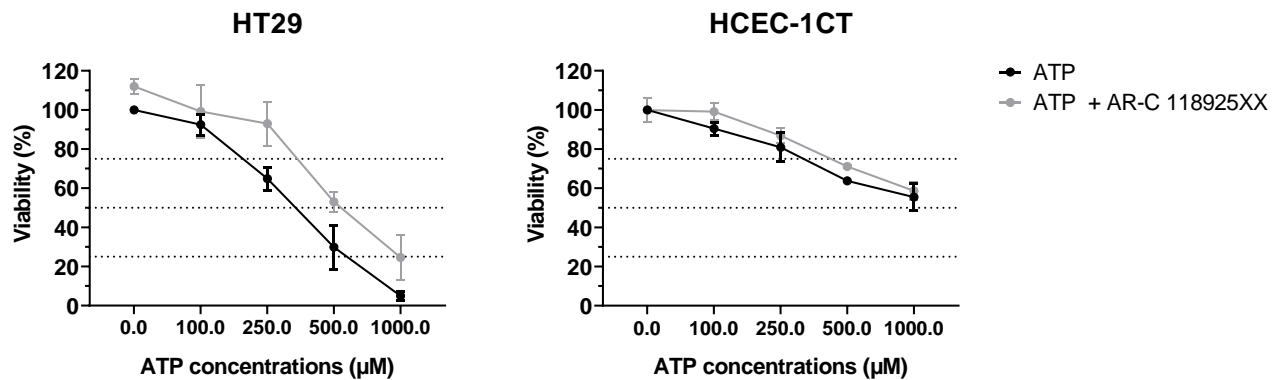

### Supplementary Figure S5

**Effect of Forskolin on cAMP levels in CRC cells.** CRC (HCT116, HT29, LS174T, LS513) and normal-like colonic (HCEC-1T) cells were treated or not for 15 minutes with the Adenylyl cyclase activator (FSK, 100  $\mu$ M) and cAMP levels determined by the cAMP Direct Immunoassay Detection Kit (Abcam).

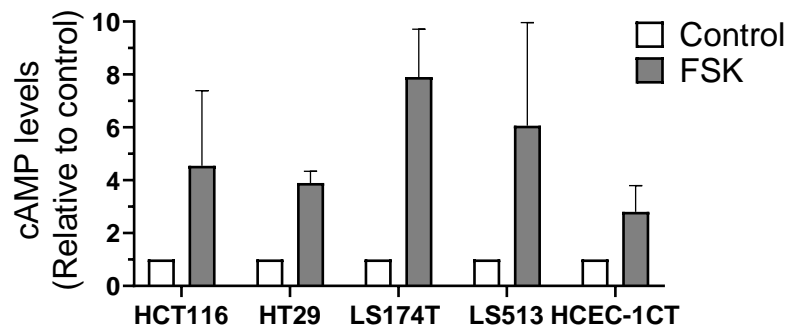

**Supplementary Figure S6**

**Effect of Forskolin on ATP anticancer activity.** CRC (HCT116, LS513) cells were treated or not for 30 minutes with the Adenylyl cyclase activator (FSK, 100  $\mu$ M) and then incubated with 250  $\mu$ M ATP for 48 hours. The percentage of dead cells (Annexin V+) was determined by flow cytometry. Data are expressed as mean  $\pm$  SD ( $n = 4$ ).

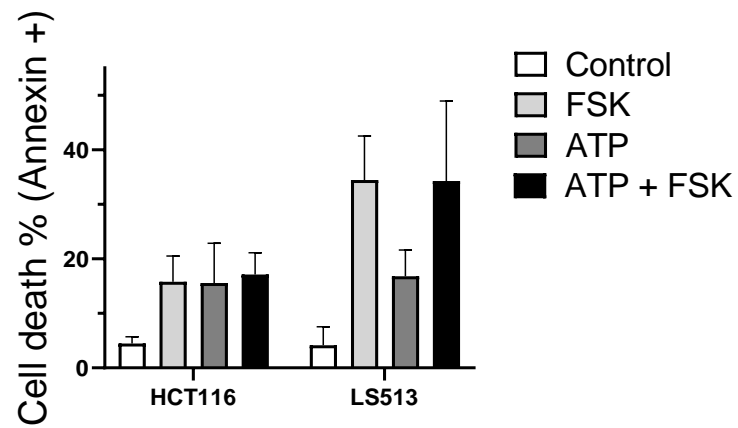

Supplement: s1 [file s1]
